# Supplementary material for: Constructing epitaxially grown heterointerface of metal nanoparticles and manganese dioxide anode for high-capacity and high-rate lithium-ion batteries
Source: Royal Society of Chemistry journal article supplement (doi:10.1039/d1nr06620j), 2021-01-01
Supplement: d1nr06620j1.pdf [file d1nr06620j1.pdf]

*Electronic Supplementary Information (ESI)*

**Constructing epitaxial grown heterointerface of metal nanoparticles and manganese dioxide anode for high-capacity and high-rate lithium-ion batteries**

*Jianwei Zhang<sup>a,#</sup>, Danyang Huang<sup>a,#</sup>, Yuchen Wang<sup>a</sup>, Liang Chang<sup>a</sup>, Yanying Yu<sup>a</sup>, Fan Li<sup>a</sup>, Jia He<sup>a</sup>, Dongqi Liu<sup>b,\*</sup> and Chao Li<sup>a,\*</sup>*

<sup>a</sup>Center for Electron Microscopy and Tianjin Key Lab of Advanced Functional Porous Materials, Institute for New Energy Materials and Low-Carbon Technologies, School of Materials Science and Engineering, Tianjin University of Technology, Tianjin 300384, China.

<sup>b</sup>School of Physics, Nankai University, Tianjin 300071, China.

E-mail: chao\_li@tjut.edu.cn, liudq@nankai.edu.cn

## Figures and Tables

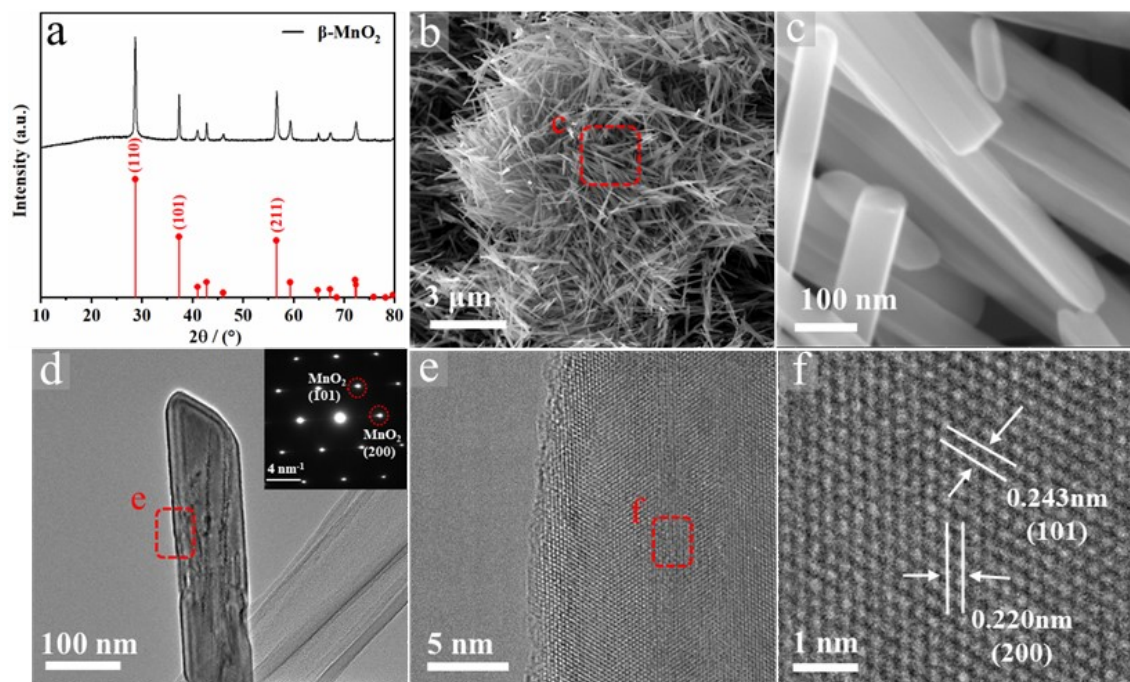

**Figure S1.** (a) X-ray diffraction pattern (b) low- and (c) high-magnification SEM images (d) HRTEM image and SAED pattern (inset) (e) low- and (f) high-magnification HRTEM images of MnO<sub>2</sub>.

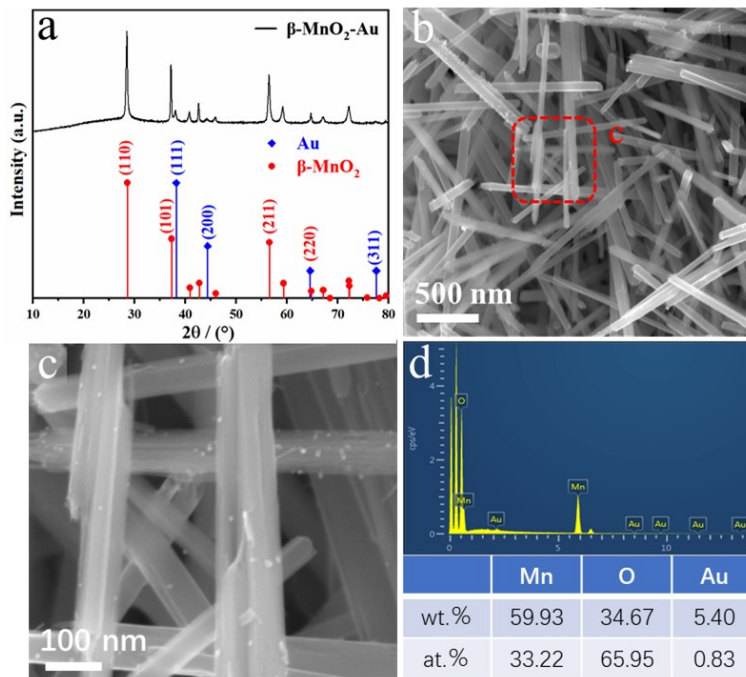

**Figure S2.** (a) X-ray diffraction pattern (b) low- and (c) high-magnification SEM images (d) Elemental analysis and a table for atomic and mass percentages of Mn, O and Au of MnO<sub>2</sub>-Au heterostructure nanorods.

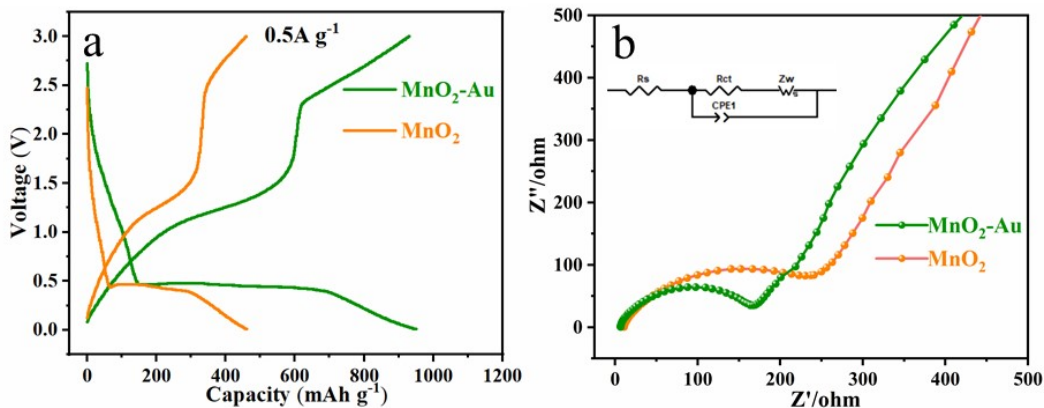

**Figure S3.** (a) The typical charge-discharge profiles of MnO<sub>2</sub> and MnO<sub>2</sub>-Au at current density of 500 mA g<sup>-1</sup> (b) The Nyquist plots of the impedance spectra of cells of MnO<sub>2</sub> and MnO<sub>2</sub>-Au. The equivalent circuit model is exhibited in the insert of Fig. S3(b). The intercept of the high-frequency semicircle on the  $Z'$  axis can be attributed to the resistance of the electrolyte ( $R_s$ ).  $R_{ct}$  are charge transfers resistance. The fitting values of kinetic parameters of MnO<sub>2</sub> and MnO<sub>2</sub>-Au cells are shown in Table S1. Compared with MnO<sub>2</sub>, MnO<sub>2</sub>-Au shows lower  $R_{ct}$ , which indicates that MnO<sub>2</sub>-Au heterojunction promotes the diffusion of lithium ions and electrons at the electrolyte/electrode interface.

**Table S1 Kinetic parameters of the MnO<sub>2</sub>-Au and MnO<sub>2</sub> electrode.**

|                      | $R_s(\Omega)$ | $R_{ct}(\Omega)$ |
|----------------------|---------------|------------------|
| MnO <sub>2</sub> -Au | 6.10          | 163.3            |
| MnO <sub>2</sub>     | 10.11         | 234.5            |

**Table S2 Summary Comparison of Electrochemical Performance between MnO<sub>2</sub>-Au and Other Manganese Oxide-Based Materials for LIBs**

| Materials                                           | Cycle numbers | Current density (mA g <sup>-1</sup> ) | Specific capacity (mA h g <sup>-1</sup> ) | ref       |
|-----------------------------------------------------|---------------|---------------------------------------|-------------------------------------------|-----------|
| MnO <sub>2</sub> -Au                                | 130           | 1000                                  | 942.3                                     | This work |
| MnO <sub>2</sub> -TiO <sub>2</sub> -Carbon          | 130           | 100                                   | 677                                       | 1         |
| Co <sub>3</sub> O <sub>4</sub> /MnO <sub>2</sub> /C | 100           | 200                                   | 854.9                                     | 2         |
| MnO <sub>2</sub> -PEI-RGO                           | 50            | 100                                   | 880                                       | 3         |
| MnO <sub>2</sub> @C Foam                            | 50            | 100                                   | 840                                       | 4         |
| G-CNT-Fe                                            | 45            | 100                                   | 1024                                      | 5         |
| MnO <sub>2</sub> -MoO <sub>3</sub>                  | 50            | 100                                   | 1000                                      | 6         |
| MnO@mcarbon                                         | 60            | 100                                   | 872.8                                     | 7         |

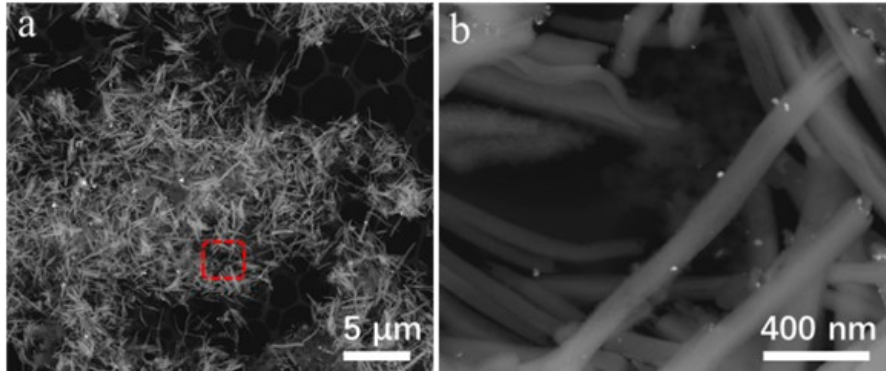

**Figure S4** (a) low- and (b) high-magnification BSE images of MnO<sub>2</sub>-Au electrode at 60th with a current density of 1 A g<sup>-1</sup>. The low-magnification SEM image shows that MnO<sub>2</sub> preserves the shape of the nanorod during the cycle process. The size of Au nanoparticles is about 20 nm, which is larger than the original size of Au nanoparticles (~5-10 nm). This result indicates that Au nanoparticles have some degree of agglomeration during the charging and discharging process.

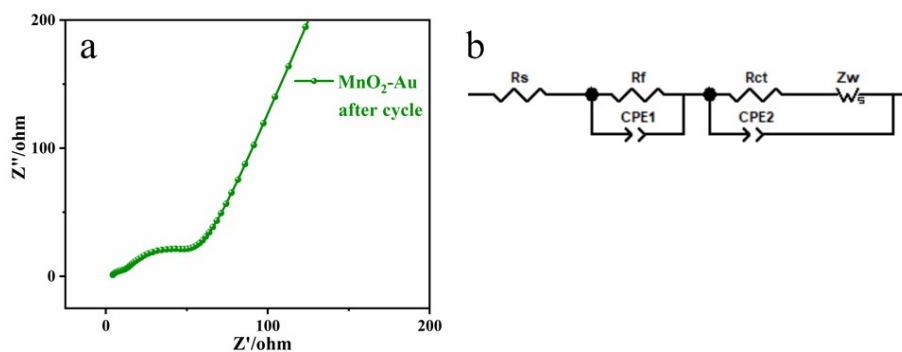

**Figure S5.** (a) The Nyquist plots of the impedance spectra of MnO<sub>2</sub>-Au cells at 60th with a current density of 1 A g<sup>-1</sup> (b) The equivalent circuit of the Nyquist plot. The equivalent circuit used for fitting is show in Fig. S5 (b), where ( $R_f$ ) is the resistance of SEI film. After circulation,  $R_s$  and  $R_{ct}$  of MnO<sub>2</sub>-Au decreased.

**Table S3 Kinetic parameters of the MnO<sub>2</sub>-Au electrode after cycle.**

|                      | $R_s(\Omega)$ | $R_f(\Omega)$ | $R_{ct}(\Omega)$ |
|----------------------|---------------|---------------|------------------|
| MnO <sub>2</sub> -Au | 4.26          | 7.331         | 45.56            |

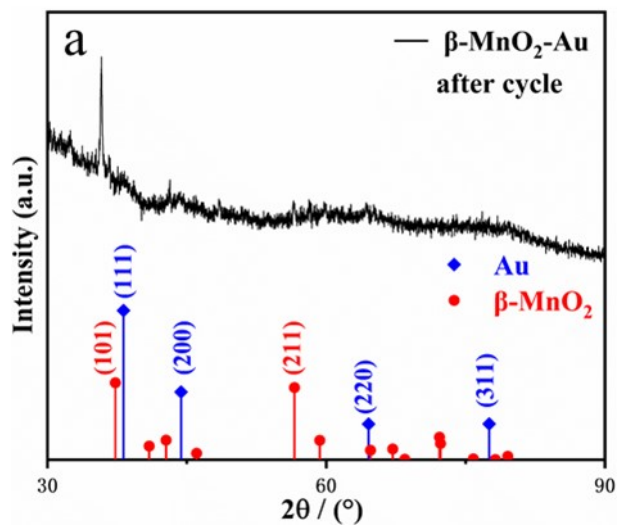

**Figure S6** XRD of MnO<sub>2</sub>-Au electrode at 60th with a current density of 1 A g<sup>-1</sup>. Compared with the XRD pattern of initial sample (Fig. S2 (a)), the peak of MnO<sub>2</sub> shifts to lower angle after cycle, which indicates the expanding of MnO<sub>2</sub> (101) plane spacing. The result may come from that lithium ions cannot be completely extracted from MnO<sub>2</sub> during the cycles.



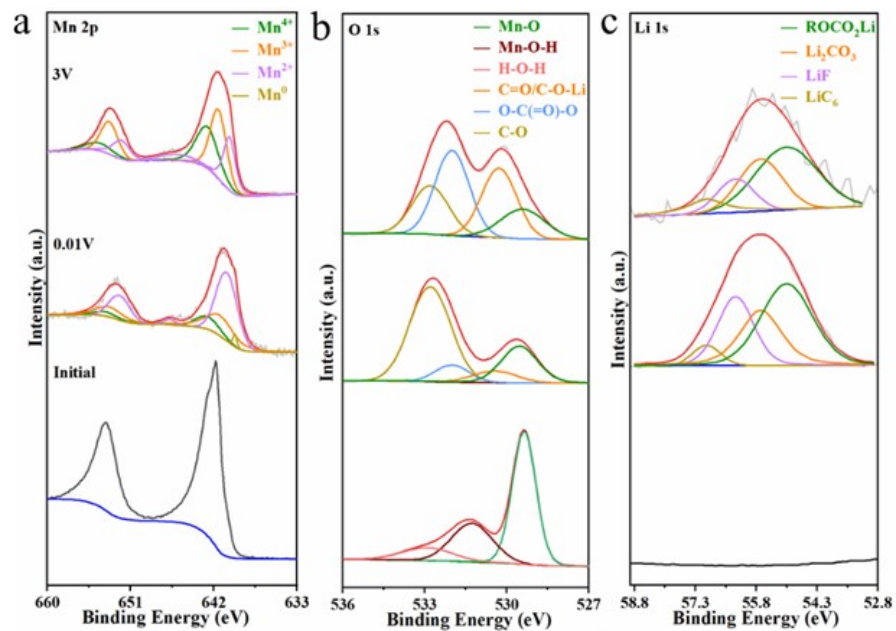

**Figure S7.** (a) Mn 2p (b) O 1s and (c) Li 1s XPS spectra of MnO<sub>2</sub> electrode at initial, discharge to 0.01 V and charge to 3 V.

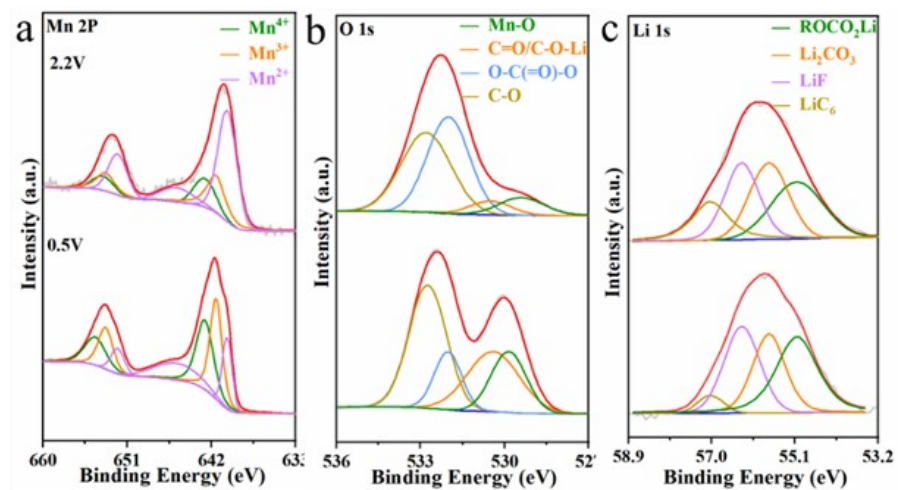

**Figure S8.** (a) Mn 2p (b) O 1s and (c) Li 1s XPS spectra of MnO<sub>2</sub> electrode at discharge to 0.5 V and charge to 2.2 V.

**Table S4 The contents of Au with various valences.**

|                      |         | Au   | Au <sup><math>\alpha</math>+</sup> | Au <sup><math>\beta</math>+</sup> ( $\beta > \alpha$ ) |
|----------------------|---------|------|------------------------------------|--------------------------------------------------------|
| MnO <sub>2</sub> -Au | Initial | 100% | 0                                  | 0                                                      |
|                      | 0.5V    | 0    | 41.0%                              | 59.0%                                                  |
|                      | 0.01V   | 0    | 100                                | 0                                                      |
|                      | 2.2V    | 100% | 0                                  | 0                                                      |
|                      | 3V      | 100% | 0                                  | 0                                                      |

**Table S5 The contents of Mn with various valences.**

|                      |         | Mn <sup>4+</sup> | Mn <sup>3+</sup> | Mn <sup>2+</sup> | Mn <sup>0</sup> |
|----------------------|---------|------------------|------------------|------------------|-----------------|
| MnO <sub>2</sub> -Au | Initial | 100%             | 0                | 0                | 0               |
|                      | 0.5V    | 33.2%            | 47.8%            | 13.2%            | 5.8%            |
|                      | 0.01V   | 23.5%            | 6.1%             | 62.5%            | 7.9%            |
|                      | 2.2V    | 26.7%            | 30.6%            | 42.7%            | 0               |
|                      | 3V      | 40.2%            | 38.6%            | 21.2%            | 0               |
| MnO <sub>2</sub>     | Initial | 100%             | 0                | 0                | 0               |
|                      | 0.5V    | 39.8%            | 40.2%            | 20.0%            | 0               |
|                      | 0.01V   | 12.0%            | 30.0%            | 55.9%            | 2.1%            |
|                      | 2.2V    | 17.7%            | 25.7%            | 56.6%            | 0               |
|                      | 3V      | 34.3%            | 40.0%            | 25.7%            | 0               |

**Table S6 The content of chemical bond of different oxygen in the initial state of the two materials.**

|                      | H-O-H | Mn-O-H | Mn-O-Mn |
|----------------------|-------|--------|---------|
| MnO <sub>2</sub>     | 12.5% | 29.0%  | 58.5%   |
| MnO <sub>2</sub> -Au | 16.7% | 42.3%  | 41.0%   |

**Table S7 The content of chemical bond of different oxygen.**

|                      |       | Mn-O  | C=O/C-O-Li | O-C(=)-O | C-O   |
|----------------------|-------|-------|------------|----------|-------|
| MnO <sub>2</sub> -Au | 0.5V  | 13.8% | 29.9%      | 23.9%    | 32.4% |
|                      | 0.01V | 17.4% | 14.8%      | 21.8%    | 46.0% |
|                      | 2.2V  | 8.8%  | 6.0%       | 43.6%    | 41.6% |
|                      | 3V    | 8.5%  | 10.0%      | 40.6%    | 40.9% |
| MnO <sub>2</sub>     | 0.5V  | 18.5% | 27.3%      | 14.0%    | 40.2% |
|                      | 0.01V | 22.2% | 8.1%       | 9.0%     | 60.7% |
|                      | 2.2V  | 14.8% | 18.5%      | 30.7%    | 36.0% |
|                      | 3V    | 15.7% | 28.8%      | 34.5%    | 21.0% |

**Table S8 The content of chemical bond of different lithium.**

|                      |       | ROCO <sub>2</sub> Li | Li <sub>2</sub> CO <sub>3</sub> | LiF   | LiC <sub>6</sub> |
|----------------------|-------|----------------------|---------------------------------|-------|------------------|
| MnO <sub>2</sub> -Au | 0.5V  | 18.3%                | 33.6%                           | 34.1% | 14.0%            |
|                      | 0.01V | 27.7%                | 25.1%                           | 24.8% | 22.4%            |
|                      | 2.2V  | 33.3%                | 25.9%                           | 21.2% | 19.6%            |
|                      | 3V    | 27.4%                | 40.3%                           | 22.7% | 9.6%             |
| MnO <sub>2</sub>     | 0.5V  | 36.9%                | 27.9%                           | 30.8% | 4.4%             |
|                      | 0.01V | 42.7%                | 26.3%                           | 25.5% | 5.5%             |
|                      | 2.2V  | 30.0%                | 26.0%                           | 26.6% | 17.4%            |
|                      | 3V    | 46.9%                | 28.1%                           | 14.9% | 10.1%            |

## References

- 1 N. Zhang, G. Guo, B. He, J. Zhu, J. Wu and J. Qiu, *Journal of Solid State Electrochemistry*, 2020, **24**, 591-599.
- 2 S. Li, M. Yang, G. He, D. Qi and J. Huang, *Materials (Basel)*, 2021, **14**, 13831-13836.
- 3 Y. Xu, X. Ye, Y. Qiu, C. Gan, L. Huang, X. Tang and X. Luo, *ChemistrySelect*, 2020, **5**, 13831-13836.
- 4 C. Chae, K. W. Kim, Y. J. Yun, D. Lee, J. Moon, Y. Choi, S. S. Lee, S. Choi and S. Jeong, *ACS Appl Mater Interfaces*, 2016, **8**, 11499-11506.
- 5 S.-H. Lee, V. Sridhar, J.-H. Jung, K. Karthikeyan, Y.-S. Lee, R. Mukherjee, N. Koratkar and I.-K. Oh, *ACS Nano*, 2013, **7**, 4242-4251.
- 6 X. Shen, T. Qian, J. Zhou, N. Xu, T. Yang and C. Yan, *ACS Appl Mater Interfaces*, 2015, **7**, 25298-25305.
- 7 Y. Liu, S. Sun, J. Han, C. Gao, L. Fan and R. Guo, *Langmuir*, 2021, **37**, 2195-2204.
